# Supplementary material for: Direct determination of trace mercury and cadmium in food by sequential electrothermal vaporization atomic fluorescence spectrometry using tungsten and gold coil traps
Source: Royal Society of Chemistry journal article supplement (doi:10.1039/c8ja00009c), 2018-01-01
Supplement: c8ja00009c1.pdf [file c8ja00009c1.pdf]

1 **Electronic Supplementary information for**

2

3 **Direct determination of trace mercury and cadmium in foods by sequential electrothermal**  
4 **vaporization atomic fluorescence spectrometry using tungsten and gold coil traps**

5 Bo Wang,<sup>‡a,d</sup> Li Feng,<sup>‡b</sup> Xuefei Mao,<sup>\*a</sup> Jixin Liu,<sup>\*a</sup> Chongchong Yu,<sup>c</sup> Lan Ding,<sup>d</sup> Siqu Li,<sup>e</sup>  
6 Chuangmu Zheng,<sup>a</sup> Yongzhong Qian<sup>a</sup>

7 <sup>a</sup>*Institute of Quality Standard and Testing Technology for Agro-products, Chinese Academy of*  
8 *Agricultural Sciences, and Key Laboratory of Agro-food Safety and Quality, Ministry of Agriculture,*  
9 *Beijing 100081, China*

10 <sup>b</sup>*Beijing Titan Instruments Company, Limited, Beijing 100015, China*

11 <sup>c</sup>*Beijing Key Laboratory of Big Data Technology for Food Safety, Beijing Technology & Business*  
12 *University (BTBU), Beijing 100048, China*

13 <sup>d</sup>*College of Chemistry, Jilin University, Changchun 130012, China*

14 <sup>e</sup>*Hebei University of Engineering, Handan 056021, China*

15 <sup>‡</sup>These authors contributed equally.

16 Corresponding authors: Tel & fax: +86-10-82106563.

17 E-mail address: mxmf08@163.com & maouxuefei@caas.cn (X. F. Mao), ljx2117@gmail.com (J. X. Liu)

## 19 **Experimental**

20 **Instrumentation.** Fig. S1 shows the full picture of the Hg-Cd analyzer. In Fig. S2, the Hg-vaporizer is  
21 also the on-line ashing unit for Cd analysis in food samples, where the quartz tube with an air gas line  
22 covered by electrical heating Ni-Cr coils connects to the catalytic oxidation tube. In Fig. S3, the catalytic  
23 oxidation tube is filled with the catalysts made of  $\text{KMnO}_4$ ,  $\text{Mn}_2\text{O}_3$ ,  $\text{V}_2\text{O}_5$  and  $\text{CaO}$  to decompose the  
24 organic gas and smoke from the sample oxidation, as well as absorb halogen and sulfur oxides in smoke  
25 at  $600\text{ }^\circ\text{C}$  -  $700\text{ }^\circ\text{C}$  to ensure the  $\text{Hg}^0$  export. The sampling boat (Fig. S4) comprises of porous carbon  
26 material, whose cost can be controlled within 1 dollar. We have proved that different boats have no  
27 influence on accurate and stable measurement when changing sampling boats. So, the present sampling  
28 boat can satisfy the demand of the solid sampling instrument.

30 **Supplementary data**

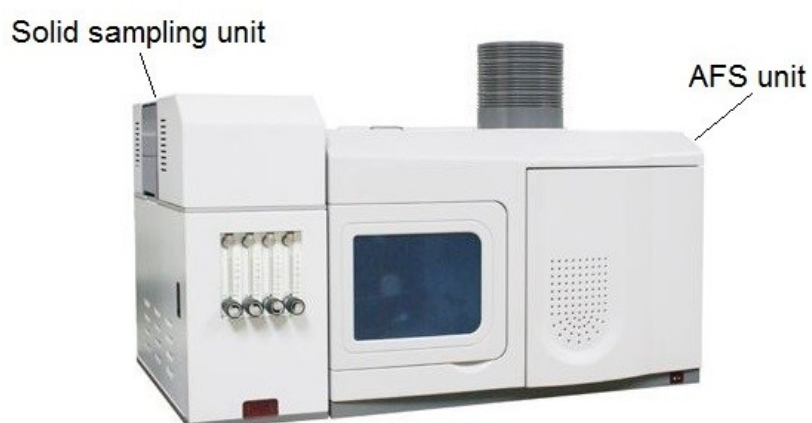

31

32 **Figure S1 The full picture of the solid sampling Hg-Cd analyzer.**

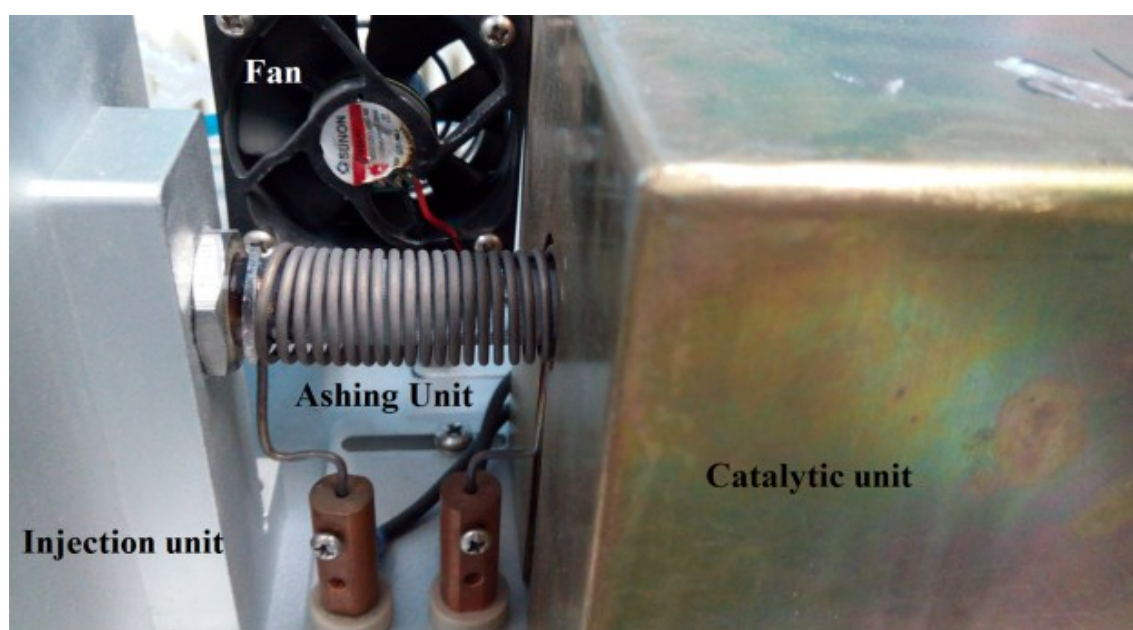

33

34 **Figure S2 The picture of Hg-vaporizer (ashing unit) of the solid sampling Hg-Cd analyzer.**

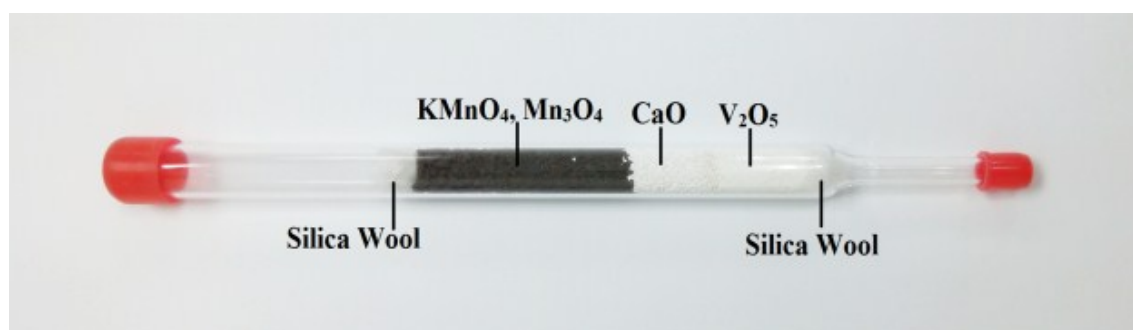

35

36 **Figure S3 The picture of the catalytic oxidation tube.**

37

Powdered rice sample in the hole

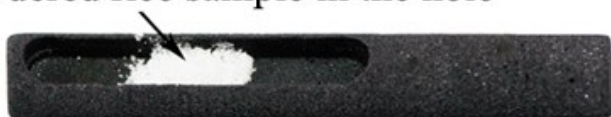

Sample boat ( $\Phi$  5×35 mm)

38

39 Figure S4 The picture of the sampling boat.
